# Supplementary material for: Insights from engraftable immunodeficient mouse models of hyperinsulinaemia
Source: PubMed Central journal article supplement (PMC5428450; doi:10.1038/s41598-017-00443-x), 2017-03-28
Supplement: 41598_2017_443_MOESM1_ESM.pdf [file 41598_2017_443_MOESM1_ESM.pdf]

**Supplementary Information: Insights from engraftable immunodeficient mouse models  
of hyperinsulinaemia**

Michelle L. Maugham<sup>1,2,3,5</sup>, Patrick B. Thomas<sup>1,2,3</sup>, Gabrielle J. Crisp<sup>1,2,3</sup>, Lisa K. Philp<sup>1,2</sup>,  
Esha T. Shah<sup>1,2,3</sup>, Adrian C. Herington<sup>1,2</sup>, Chen Chen<sup>4</sup>, Laura S. Gregory<sup>5</sup>, Colleen C.  
Nelson<sup>2</sup>, Inge Seim<sup>1,2,3</sup>, Penny L. Jeffery<sup>1,2,3\*</sup>, Lisa K. Chopin<sup>1,2,3\*</sup>

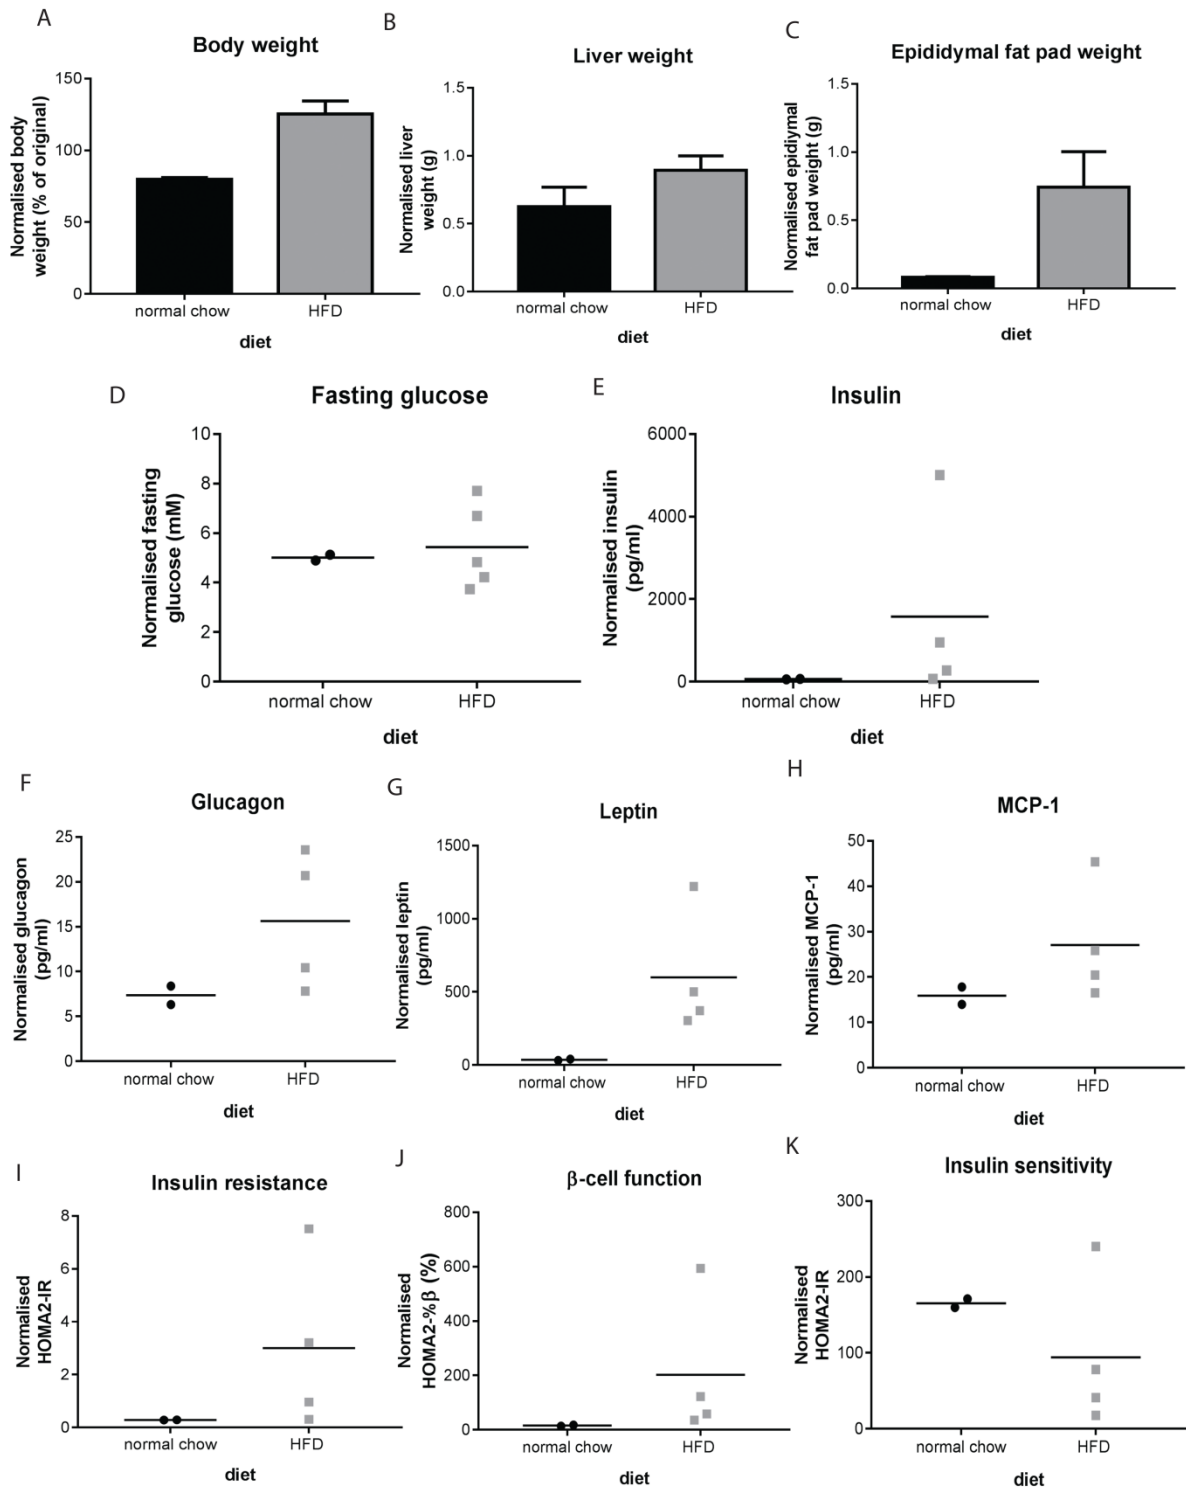

Figure S1. *Rag1*<sup>-/-</sup> mice with LNCaP xenografts fed a Western HFD (n=4-5) have more pronounced symptoms of metabolic syndrome compared to mice fed low-fat chow-fed (n=2). **(A)** Endpoint body weight (percent of original weight) of LNCaP xenograft implanted HFD-fed *Rag1*<sup>-/-</sup> mice compared to low-fat chow-fed *Rag1*<sup>-/-</sup> mice. **(B)** Endpoint liver weight in HFD and low-fat chow-fed *Rag1*<sup>-/-</sup> mice. **(C)** Epididymal fat pad weight in HFD-fed *Rag1*<sup>-/-</sup>

mice compared to low-fat chow-fed *Rag1*<sup>-/-</sup> mice at endpoint. **(D)** Fasting serum glucose levels in LNCaP xenograft implanted HFD-fed *Rag1*<sup>-/-</sup> mice compared to low-fat chow-fed *Rag1*<sup>-/-</sup> mice. **(E)** Fasting serum insulin levels in *Rag1*<sup>-/-</sup> HFD and low-fat chow-fed mice. **(F)** Fasting serum glucagon levels are greater in HFD-fed *Rag1*<sup>-/-</sup> mice compared to low-fat chow-fed *Rag1*<sup>-/-</sup> mice at endpoint. **(G)** Fasting serum leptin levels in HFD-fed *Rag1*<sup>-/-</sup> mice compared to chow-fed *Rag1*<sup>-/-</sup> mice suggest dysregulation of energy balance in these HFD-fed mice. **(H)** Greater serum MCP-1 levels in HFD-fed *Rag1*<sup>-/-</sup> mice compared to chow-fed *Rag1*<sup>-/-</sup> mice indicate greater systemic inflammation indicative of metabolic dysregulation. **(I)** Insulin resistance (HOMA-IR) at endpoint is greater in HFD-fed mice compared to low-fat chow-fed mice. **(J)** Steady state  $\beta$ -cell function (HOMA%  $\beta$ ) is higher in HFD-fed *Rag1*<sup>-/-</sup> mice compared to low-fat chow-fed *Rag1*<sup>-/-</sup> mice. **(K)** Insulin sensitivity (HOMA%S) is higher at endpoint in HFD-fed mice compared to low-fat chow-fed mice. All data have been normalised to time since weaning and is shown as mean + SEM. Statistically significant differences were determined by Kruskal-Wallis and Mann-Whitney tests. *P*= NS.
